# Supplementary material for: Importance of isothermal titration calorimetry for the detection of the direct binding of metal ions to mismatched base pairs in duplex DNA
Source: Royal Society of Chemistry journal article supplement (doi:10.1039/d2dt02097a), 2023-01-01
Supplement: d2dt02097a1.pdf [file d2dt02097a1.pdf]

## Supplementary Information

Importance of isothermal titration calorimetry for the detection of the direct binding of metal ions to mismatched base pairs in duplex DNA

Hidetaka Torigoe<sup>a,\*</sup> and Fumihiko Arakawa<sup>a</sup>

<sup>a</sup>*Department of Applied Chemistry, Faculty of Science, Tokyo University of Science, 1-3 Kagurazaka, Shinjuku-ku, Tokyo 162-8601, Japan*

\*Corresponding author. Tel.: +81-3-5228-8259; Fax: +81-3-5261-4631;

*E-mail address:* htorigoe@rs.tus.ac.jp (Hidetaka Torigoe)

**Table S1.** Melting temperatures ( $T_m$ ) of 1  $\mu$ M duplex DNA [F21X:R21Y (X-Y=A-A, A-C, A-G, A-T, G-A, G-C, G-G, G-T, T-A, T-C, T-G and T-T)] at pH 6.8 in 10 mM sodium cacodylate-cacodylic acid and 100 mM NaClO<sub>4</sub> without or with 1 or 2  $\mu$ M AgNO<sub>3</sub>, obtained from UV melting.

| X-Y | $T_m$ (-Ag <sup>+</sup> )<br>(°C) | $T_m$ (+Ag <sup>+</sup> )<br>(°C) | $\Delta T_m$ (°C) <sup>a</sup> | $T_m$ (+2Ag <sup>+</sup> )<br>(°C) | $\Delta T_{m2}$ (°C) <sup>b</sup> |
|-----|-----------------------------------|-----------------------------------|--------------------------------|------------------------------------|-----------------------------------|
| A-A | 59.5 ± 0.3                        | 60.7 ± 0.7                        | 1.2                            | 61.9 ± 0.2                         | 2.4                               |
| A-C | 60.9 ± 0.3                        | 62.6 ± 0.4                        | 1.7                            | 64.5 ± 0.7                         | 3.6                               |
| A-G | 64.6 ± 0.4                        | 65.4 ± 0.6                        | 0.8                            | 65.8 ± 0.7                         | 1.2                               |
| A-T | 67.6 ± 0.4                        | 68.3 ± 0.1                        | 0.7                            | 70.1 ± 0.6                         | 2.5                               |
| G-A | 62.4 ± 0.4                        | 64.1 ± 0.8                        | 1.7                            | 66.1 ± 0.4                         | 3.7                               |
| G-C | 71.2 ± 0.5                        | 72.8 ± 0.4                        | 1.6                            | 73.9 ± 0.9                         | 2.7                               |
| G-G | 64.8 ± 0.3                        | 65.7 ± 0.4                        | 0.9                            | 66.0 ± 0.7                         | 1.2                               |
| G-T | 64.9 ± 0.3                        | 65.9 ± 0.2                        | 1.0                            | 67.6 ± 0.9                         | 2.7                               |
| T-A | 65.8 ± 0.4                        | 66.7 ± 0.6                        | 0.9                            | 68.9 ± 0.5                         | 3.1                               |
| T-C | 58.3 ± 0.3                        | 59.9 ± 0.4                        | 1.6                            | 62.5 ± 0.7                         | 4.2                               |
| T-G | 62.2 ± 0.3                        | 63.0 ± 0.1                        | 0.8                            | 63.7 ± 0.3                         | 1.5                               |
| T-T | 60.1 ± 0.2                        | 61.3 ± 0.6                        | 1.2                            | 62.2 ± 0.4                         | 2.1                               |

<sup>a</sup>  $\Delta T_m = T_m (+Ag^+) - T_m (-Ag^+)$ . <sup>b</sup>  $\Delta T_{m2} = T_m (+2Ag^+) - T_m (-Ag^+)$ .

**Table S2:** Melting temperatures ( $T_m$ ) of 1  $\mu$ M duplex DNA [F21X:R21Y (X-Y=A-A, A-C, A-G, A-T, C-A, C-C, C-G, C-T, G-A, G-C, G-G, G-T, T-A, T-C, T-G and T-T)] at pH 6.8 in 10 mM sodium cacodylate-cacodylic acid and 100 mM NaClO<sub>4</sub> without or with 2  $\mu$ M Mn(NO<sub>3</sub>)<sub>2</sub>, obtained from UV melting.

| X-Y | $T_m$ (-Mn <sup>2+</sup> ) (°C) | $T_m$ (+2Mn <sup>2+</sup> ) (°C) | $\Delta T_m$ (°C) <sup>a</sup> |
|-----|---------------------------------|----------------------------------|--------------------------------|
| A-A | 59.5 ± 0.3                      | 59.5 ± 0.1                       | 0.0                            |
| A-C | 60.9 ± 0.3                      | 61.6 ± 0.1                       | 0.7                            |
| A-G | 64.6 ± 0.4                      | 64.5 ± 0.8                       | -0.1                           |
| A-T | 67.6 ± 0.4                      | 67.8 ± 0.6                       | 0.2                            |
| C-A | 59.2 ± 0.1                      | 58.9 ± 0.2                       | -0.3                           |
| C-C | 57.5 ± 0.7                      | 57.6 ± 0.1                       | 0.1                            |
| C-G | 68.9 ± 0.8                      | 68.6 ± 0.1                       | -0.3                           |
| C-T | 58.7 ± 0.6                      | 59.1 ± 0.4                       | 0.4                            |
| G-A | 62.4 ± 0.4                      | 62.2 ± 0.7                       | -0.2                           |
| G-C | 71.2 ± 0.5                      | 71.3 ± 0.8                       | 0.1                            |
| G-G | 64.8 ± 0.3                      | 64.4 ± 0.2                       | -0.4                           |
| G-T | 64.9 ± 0.3                      | 64.9 ± 0.3                       | 0.0                            |
| T-A | 65.8 ± 0.4                      | 65.9 ± 0.9                       | 0.1                            |
| T-C | 58.3 ± 0.3                      | 58.8 ± 0.7                       | 0.5                            |
| T-G | 62.2 ± 0.3                      | 62.0 ± 0.3                       | -0.2                           |
| T-T | 60.1 ± 0.2                      | 60.4 ± 0.2                       | 0.3                            |

<sup>a</sup>  $\Delta T_m = T_m (+2Mn^{2+}) - T_m (-Mn^{2+})$ .

**Table S3:** Melting temperatures ( $T_m$ ) of 1  $\mu$ M duplex DNA [F21X:R21Y (X-Y=A-A, A-C, A-G, A-T, C-A, C-C, C-G, C-T, G-A, G-C, G-G, G-T, T-A, T-C, T-G and T-T)] at pH 6.8 in 10 mM sodium cacodylate-cacodylic acid and 100 mM NaClO<sub>4</sub> without or with 2  $\mu$ M Co(NO<sub>3</sub>)<sub>2</sub>, obtained from UV melting.

| X-Y | $T_m$ (-Co <sup>2+</sup> ) (°C) | $T_m$ (+2Co <sup>2+</sup> ) (°C) | $\Delta T_m$ (°C) <sup>a</sup> |
|-----|---------------------------------|----------------------------------|--------------------------------|
| A-A | 59.5 ± 0.3                      | 58.9 ± 0.5                       | -0.6                           |
| A-C | 60.9 ± 0.3                      | 60.9 ± 0.5                       | 0.0                            |
| A-G | 64.6 ± 0.4                      | 64.5 ± 0.7                       | -0.1                           |
| A-T | 67.6 ± 0.4                      | 68.1 ± 0.8                       | 0.5                            |
| C-A | 59.2 ± 0.1                      | 58.9 ± 0.3                       | -0.3                           |
| C-C | 57.5 ± 0.7                      | 57.8 ± 0.5                       | 0.3                            |
| C-G | 68.9 ± 0.8                      | 69.0 ± 0.4                       | 0.1                            |
| C-T | 58.7 ± 0.6                      | 58.8 ± 0.2                       | 0.1                            |
| G-A | 62.4 ± 0.4                      | 62.1 ± 0.3                       | -0.3                           |
| G-C | 71.2 ± 0.5                      | 72.1 ± 0.5                       | 0.9                            |
| G-G | 64.8 ± 0.3                      | 64.3 ± 0.5                       | -0.5                           |
| G-T | 64.9 ± 0.3                      | 64.8 ± 0.3                       | -0.1                           |
| T-A | 65.8 ± 0.4                      | 65.7 ± 0.6                       | -0.1                           |
| T-C | 58.3 ± 0.3                      | 58.7 ± 0.5                       | 0.4                            |
| T-G | 62.2 ± 0.3                      | 61.7 ± 0.7                       | -0.5                           |
| T-T | 60.1 ± 0.2                      | 60.0 ± 0.7                       | -0.1                           |

<sup>a</sup>  $\Delta T_m = T_m (+2Co^{2+}) - T_m (-Co^{2+})$ .

**Table S4:** Melting temperatures ( $T_m$ ) of 1  $\mu$ M duplex DNA [F21X:R21Y (X-Y=A-A, A-C, A-G, A-T, C-A, C-C, C-G, C-T, G-A, G-C, G-G, G-T, T-A, T-C, T-G and T-T)] at pH 6.8 in 10 mM sodium cacodylate-cacodylic acid and 100 mM NaClO<sub>4</sub> without or with 2  $\mu$ M Ni(NO<sub>3</sub>)<sub>2</sub>, obtained from UV melting.

| X-Y | $T_m$ (-Ni <sup>2+</sup> ) (°C) | $T_m$ (+2Ni <sup>2+</sup> ) (°C) | $\Delta T_m$ (°C) <sup>a</sup> |
|-----|---------------------------------|----------------------------------|--------------------------------|
| A-A | 59.5 ± 0.3                      | 59.3 ± 0.7                       | -0.2                           |
| A-C | 60.9 ± 0.3                      | 61.1 ± 0.7                       | 0.2                            |
| A-G | 64.6 ± 0.4                      | 64.2 ± 0.4                       | -0.4                           |
| A-T | 67.6 ± 0.4                      | 67.6 ± 0.5                       | 0.0                            |
| C-A | 59.2 ± 0.1                      | 59.0 ± 0.6                       | -0.2                           |
| C-C | 57.5 ± 0.7                      | 57.6 ± 0.8                       | 0.1                            |
| C-G | 68.9 ± 0.8                      | 68.8 ± 0.7                       | -0.1                           |
| C-T | 58.7 ± 0.6                      | 58.8 ± 0.3                       | 0.1                            |
| G-A | 62.4 ± 0.4                      | 61.8 ± 0.3                       | -0.6                           |
| G-C | 71.2 ± 0.5                      | 70.8 ± 0.2                       | -0.4                           |
| G-G | 64.8 ± 0.3                      | 64.2 ± 0.5                       | -0.6                           |
| G-T | 64.9 ± 0.3                      | 64.8 ± 0.4                       | -0.1                           |
| T-A | 65.8 ± 0.4                      | 65.2 ± 0.7                       | -0.6                           |
| T-C | 58.3 ± 0.3                      | 58.2 ± 0.7                       | -0.1                           |
| T-G | 62.2 ± 0.3                      | 61.7 ± 0.5                       | -0.5                           |
| T-T | 60.1 ± 0.2                      | 60.2 ± 0.4                       | 0.1                            |

<sup>a</sup>  $\Delta T_m = T_m (+2Ni^{2+}) - T_m (-Ni^{2+})$ .

**Table S5:** Melting temperatures ( $T_m$ ) of 1  $\mu$ M duplex DNA [F21X:R21Y (X-Y=A-A, A-C, A-G, A-T, C-A, C-C, C-G, C-T, G-A, G-C, G-G, G-T, T-A, T-C, T-G and T-T)] at pH 6.8 in 10 mM sodium cacodylate-cacodylic acid and 100 mM NaClO<sub>4</sub> without or with 2  $\mu$ M Zn(NO<sub>3</sub>)<sub>2</sub>, obtained from UV melting.

| <b>X-Y</b> | $T_m$ (-Zn <sup>2+</sup> ) (°C) | $T_m$ (+2Zn <sup>2+</sup> ) (°C) | $\Delta T_m$ (°C) <sup>a</sup> |
|------------|---------------------------------|----------------------------------|--------------------------------|
| A-A        | 59.5 ± 0.3                      | 59.6 ± 0.4                       | 0.1                            |
| A-C        | 60.9 ± 0.3                      | 61.5 ± 0.2                       | 0.6                            |
| A-G        | 64.6 ± 0.4                      | 64.5 ± 0.5                       | -0.1                           |
| A-T        | 67.6 ± 0.4                      | 68.0 ± 0.6                       | 0.4                            |
| C-A        | 59.2 ± 0.1                      | 59.1 ± 0.3                       | -0.1                           |
| C-C        | 57.5 ± 0.7                      | 57.9 ± 0.4                       | 0.4                            |
| C-G        | 68.9 ± 0.8                      | 68.7 ± 0.4                       | -0.2                           |
| C-T        | 58.7 ± 0.6                      | 58.6 ± 0.1                       | -0.1                           |
| G-A        | 62.4 ± 0.4                      | 62.2 ± 0.4                       | -0.2                           |
| G-C        | 71.2 ± 0.5                      | 71.7 ± 0.6                       | 0.5                            |
| G-G        | 64.8 ± 0.3                      | 64.8 ± 0.7                       | 0.0                            |
| G-T        | 64.9 ± 0.3                      | 65.3 ± 0.6                       | 0.4                            |
| T-A        | 65.8 ± 0.4                      | 65.8 ± 0.6                       | 0.0                            |
| T-C        | 58.3 ± 0.3                      | 58.7 ± 0.4                       | 0.4                            |
| T-G        | 62.2 ± 0.3                      | 62.0 ± 0.3                       | -0.2                           |
| T-T        | 60.1 ± 0.2                      | 60.3 ± 0.1                       | 0.2                            |

<sup>a</sup>  $\Delta T_m = T_m (+2Zn^{2+}) - T_m (-Zn^{2+})$ .

**Table S6:** Melting temperatures ( $T_m$ ) of 1  $\mu$ M duplex DNA [F21X:R21Y (X-Y=A-A, A-C, A-G, A-T, C-A, C-C, C-G, C-T, G-A, G-C, G-G, G-T, T-A, T-C, T-G and T-T)] at pH 6.8 in 10 mM sodium cacodylate-cacodylic acid and 100 mM NaClO<sub>4</sub> without or with 2  $\mu$ M Cd(NO<sub>3</sub>)<sub>2</sub>, obtained from UV melting.

| X-Y | $T_m$ (-Cd <sup>2+</sup> ) (°C) | $T_m$ (+2Cd <sup>2+</sup> ) (°C) | $\Delta T_m$ (°C) <sup>a</sup> |
|-----|---------------------------------|----------------------------------|--------------------------------|
| A-A | 59.5 ± 0.3                      | 59.5 ± 0.4                       | 0.0                            |
| A-C | 60.9 ± 0.3                      | 61.2 ± 0.3                       | 0.3                            |
| A-G | 64.6 ± 0.4                      | 64.6 ± 0.5                       | 0.0                            |
| A-T | 67.6 ± 0.4                      | 68.0 ± 0.5                       | 0.4                            |
| C-A | 59.2 ± 0.1                      | 58.8 ± 0.1                       | -0.4                           |
| C-C | 57.5 ± 0.7                      | 57.8 ± 0.2                       | 0.3                            |
| C-G | 68.9 ± 0.8                      | 69.5 ± 0.6                       | 0.6                            |
| C-T | 58.7 ± 0.6                      | 59.2 ± 0.5                       | 0.5                            |
| G-A | 62.4 ± 0.4                      | 61.9 ± 0.1                       | -0.5                           |
| G-C | 71.2 ± 0.5                      | 71.2 ± 0.1                       | 0.0                            |
| G-G | 64.8 ± 0.3                      | 64.5 ± 0.4                       | -0.3                           |
| G-T | 64.9 ± 0.3                      | 64.9 ± 0.3                       | 0.0                            |
| T-A | 65.8 ± 0.4                      | 65.7 ± 0.6                       | -0.1                           |
| T-C | 58.3 ± 0.3                      | 58.8 ± 0.5                       | 0.5                            |
| T-G | 62.2 ± 0.3                      | 61.8 ± 0.2                       | -0.4                           |
| T-T | 60.1 ± 0.2                      | 60.2 ± 0.1                       | 0.1                            |

<sup>a</sup>  $\Delta T_m = T_m (+2Cd^{2+}) - T_m (-Cd^{2+})$ .

**Table S7:** Melting temperatures ( $T_m$ ) of 1  $\mu$ M duplex DNA [F21X:R21Y (X-Y=A-A, A-C, A-G, A-T, C-A, C-C, C-G, C-T, G-A, G-C, G-G, G-T, T-A, T-C, T-G and T-T)] at pH 6.8 in 10 mM sodium cacodylate-cacodylic acid and 100 mM NaClO<sub>4</sub> without or with 2  $\mu$ M TlNO<sub>3</sub>, obtained from UV melting.

| <b>X-Y</b> | $T_m$ (-Tl <sup>+</sup> ) (°C) | $T_m$ (+2Tl <sup>+</sup> ) (°C) | $\Delta T_m$ (°C) <sup>a</sup> |
|------------|--------------------------------|---------------------------------|--------------------------------|
| A-A        | 59.5 ± 0.3                     | 58.8 ± 0.2                      | -0.7                           |
| A-C        | 60.9 ± 0.3                     | 60.6 ± 0.3                      | -0.3                           |
| A-G        | 64.6 ± 0.4                     | 64.0 ± 0.2                      | -0.6                           |
| A-T        | 67.6 ± 0.4                     | 67.1 ± 0.2                      | -0.5                           |
| C-A        | 59.2 ± 0.1                     | 58.6 ± 0.3                      | -0.6                           |
| C-C        | 57.5 ± 0.7                     | 57.2 ± 0.2                      | -0.3                           |
| C-G        | 68.9 ± 0.8                     | 68.7 ± 0.5                      | -0.2                           |
| C-T        | 58.7 ± 0.6                     | 58.4 ± 0.3                      | -0.3                           |
| G-A        | 62.4 ± 0.4                     | 62.1 ± 0.6                      | -0.3                           |
| G-C        | 71.2 ± 0.5                     | 70.9 ± 0.4                      | -0.3                           |
| G-G        | 64.8 ± 0.3                     | 64.6 ± 0.4                      | -0.2                           |
| G-T        | 64.9 ± 0.3                     | 64.7 ± 0.6                      | -0.2                           |
| T-A        | 65.8 ± 0.4                     | 65.5 ± 0.7                      | -0.3                           |
| T-C        | 58.3 ± 0.3                     | 57.9 ± 0.3                      | -0.4                           |
| T-G        | 62.2 ± 0.3                     | 61.6 ± 0.1                      | -0.6                           |
| T-T        | 60.1 ± 0.2                     | 59.5 ± 0.2                      | -0.6                           |

<sup>a</sup>  $\Delta T_m = T_m (+2Tl^+) - T_m (-Tl^+)$ .



**Table S8:** Melting temperatures ( $T_m$ ) of 1  $\mu$ M duplex DNA [F21X:R21Y (X-Y=A-A, A-C, A-G, A-T, C-A, C-C, C-G, C-T, G-A, G-C, G-G, G-T, T-A, T-C, T-G and T-T)] at pH 6.8 in 10 mM sodium cacodylate-cacodylic acid and 100 mM NaClO<sub>4</sub> without or with 2  $\mu$ M Pb(NO<sub>3</sub>)<sub>2</sub>, obtained from UV melting.

| <b>X-Y</b> | $T_m$ (-Pb <sup>2+</sup> ) (°C) | $T_m$ (+2Pb <sup>2+</sup> ) (°C) | $\Delta T_m$ (°C) <sup>a</sup> |
|------------|---------------------------------|----------------------------------|--------------------------------|
| A-A        | 59.5 ± 0.3                      | 58.9 ± 0.4                       | -0.6                           |
| A-C        | 60.9 ± 0.3                      | 60.6 ± 0.1                       | -0.3                           |
| A-G        | 64.6 ± 0.4                      | 63.8 ± 0.2                       | -0.8                           |
| A-T        | 67.6 ± 0.4                      | 66.7 ± 0.1                       | -0.9                           |
| C-A        | 59.2 ± 0.1                      | 58.4 ± 0.2                       | -0.8                           |
| C-C        | 57.5 ± 0.7                      | 57.0 ± 0.2                       | -0.5                           |
| C-G        | 68.9 ± 0.8                      | 68.1 ± 0.2                       | -0.8                           |
| C-T        | 58.7 ± 0.6                      | 57.9 ± 0.1                       | -0.8                           |
| G-A        | 62.4 ± 0.4                      | 61.7 ± 0.3                       | -0.7                           |
| G-C        | 71.2 ± 0.5                      | 70.9 ± 0.5                       | -0.3                           |
| G-G        | 64.8 ± 0.3                      | 64.5 ± 0.4                       | -0.3                           |
| G-T        | 64.9 ± 0.3                      | 64.4 ± 0.4                       | -0.5                           |
| T-A        | 65.8 ± 0.4                      | 64.9 ± 0.3                       | -0.9                           |
| T-C        | 58.3 ± 0.3                      | 57.7 ± 0.3                       | -0.6                           |
| T-G        | 62.2 ± 0.3                      | 61.7 ± 0.4                       | -0.5                           |
| T-T        | 60.1 ± 0.2                      | 59.6 ± 0.2                       | -0.5                           |

<sup>a</sup>  $\Delta T_m = T_m (+2Pb^{2+}) - T_m (-Pb^{2+})$ .

**Table S9:** Melting temperatures ( $T_m$ ) of 1  $\mu\text{M}$  duplex DNA [F25Z:R25W (Z-W=A-A, A-C, A-G, A-T, C-A, C-C, C-G, C-T, G-A, G-C, G-G, G-T, T-A, T-C, T-G, and T-T)] at pH 6.8 in 10 mM sodium cacodylate-cacodylic acid and 100 mM  $\text{NaClO}_4$  without or with 1 or 2  $\mu\text{M}$   $\text{AgNO}_3$ , obtained from UV melting.

| Z-W | $T_m$ (-Ag <sup>+</sup> )<br>(°C) | $T_m$ (+Ag <sup>+</sup> )<br>(°C) | $\Delta T_m$ (°C) <sup>a</sup> | $T_m$ (+2Ag <sup>+</sup> )<br>(°C) | $\Delta T_{m2}$ (°C) <sup>b</sup> |
|-----|-----------------------------------|-----------------------------------|--------------------------------|------------------------------------|-----------------------------------|
| A-A | 67.2 ± 0.1                        | 68.5 ± 0.7                        | 1.3                            | 68.8 ± 0.2                         | 1.6                               |
| A-C | 68.4 ± 0.5                        | 70.2 ± 0.4                        | 1.8                            | 70.8 ± 0.7                         | 2.4                               |
| A-G | 71.7 ± 0.4                        | 72.6 ± 0.6                        | 0.9                            | 72.5 ± 0.7                         | 0.8                               |
| A-T | 73.6 ± 0.2                        | 74.4 ± 0.1                        | 0.8                            | 75.3 ± 0.6                         | 1.7                               |
| C-A | 66.9 ± 0.3                        | 68.4 ± 0.8                        | 1.5                            | 69.5 ± 0.5                         | 2.6                               |
| C-C | 66.5 ± 0.8                        | 69.5 ± 0.8                        | 3.0                            | 70.2 ± 0.3                         | 3.7                               |
| C-G | 74.7 ± 0.5                        | 75.9 ± 0.3                        | 1.2                            | 75.9 ± 0.7                         | 1.2                               |
| C-T | 67.9 ± 0.3                        | 69.4 ± 0.7                        | 1.5                            | 70.7 ± 0.5                         | 2.8                               |
| G-A | 69.8 ± 0.6                        | 71.6 ± 0.8                        | 1.8                            | 72.3 ± 0.4                         | 2.5                               |
| G-C | 76.6 ± 0.8                        | 78.3 ± 0.4                        | 1.7                            | 78.4 ± 1.0                         | 1.8                               |
| G-G | 72.1 ± 0.2                        | 73.1 ± 0.4                        | 1.0                            | 72.9 ± 0.7                         | 0.8                               |
| G-T | 72.1 ± 0.1                        | 73.2 ± 0.2                        | 1.1                            | 73.9 ± 0.9                         | 1.8                               |
| T-A | 71.7 ± 0.0                        | 72.7 ± 0.6                        | 1.0                            | 73.8 ± 0.5                         | 2.1                               |
| T-C | 66.7 ± 0.7                        | 68.4 ± 0.4                        | 1.7                            | 69.5 ± 0.7                         | 2.8                               |
| T-G | 69.7 ± 0.5                        | 70.6 ± 0.1                        | 0.9                            | 70.7 ± 0.3                         | 1.0                               |
| T-T | 68.4 ± 0.3                        | 69.7 ± 0.6                        | 1.3                            | 69.8 ± 0.4                         | 1.4                               |

<sup>a</sup>  $\Delta T_m = T_m (+\text{Ag}^+) - T_m (-\text{Ag}^+)$ . <sup>b</sup>  $\Delta T_{m2} = T_m (+2\text{Ag}^+) - T_m (-\text{Ag}^+)$ .

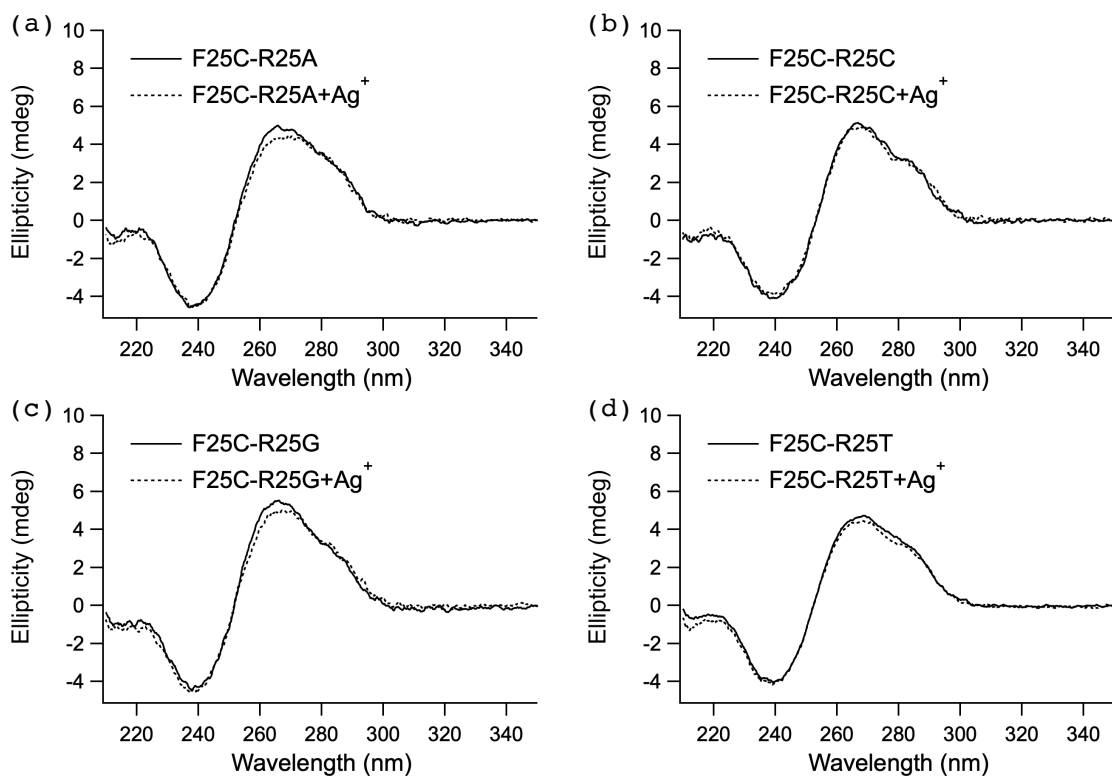

**Figure S1:** CD spectra of the duplex DNA, F25C-R25A (a), F25C-R25C (b), F25C-R25G (c), and F25C-R25T (d), without or with  $\text{AgNO}_3$ . Duplex DNA ( $1 \mu\text{M}$ ) at  $25^\circ\text{C}$  and pH 6.8 in buffer A (see *UV melting*) without or with  $1 \mu\text{M}$   $\text{AgNO}_3$  were measured at a wavelength of 210-350 nm. The cell path length was 1 cm.

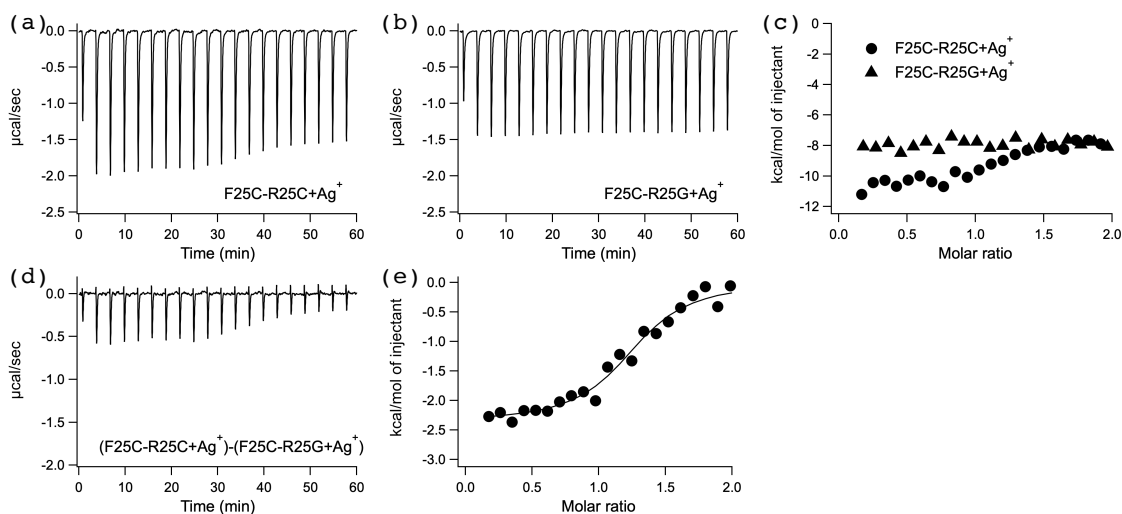

**Figure S2:** Thermodynamic analyses of the interaction between  $\text{Ag}^+$  and each of the C-C mismatches (F25C-R25C) and the perfectly matched duplex DNA (F25C-R25G). (a, b) Typical ITC profile for the interaction between  $\text{AgNO}_3$  and F25C-R25C (a) and F25C-R25G (b) at  $25^\circ\text{C}$  and pH 6.8 in buffer A (see *UV melting*).  $\text{AgNO}_3$  solution (1 mM in buffer A) was injected 20 times in 5  $\mu\text{l}$  increments into each of F25C-R25C (a) and F25C-R25G (b) solution (40  $\mu\text{M}$  in buffer A). Injections were administered over 12 s at 3 min intervals. (c) Titration plots against the molar ratio of  $[\text{Ag}^+]/[\text{duplex DNA}]$ , obtained from the ITC profiles in (a) and (b). (d) ITC profile for the binding between  $\text{Ag}^+$  and the C-C mismatched base pair, obtained by subtracting the ITC profile observed for F25C-R25G in (b) from that observed for F25C-R25C in (a). (e) Titration plot against the molar ratio of  $[\text{Ag}^+]/[\text{duplex DNA}]$ , obtained from the ITC profile in (d). The data were fitted by a nonlinear least-squares method.
